# Supplementary material for: Interactions between heparin and SARS-CoV-2 spike glycoprotein RBD from omicron and other variants
Source: PubMed Central journal article supplement (PMC9420978; doi:10.3389/fmolb.2022.912887), 2022-08-15
Supplement: Image1.pdf [file Image1.pdf]

Supporting information:

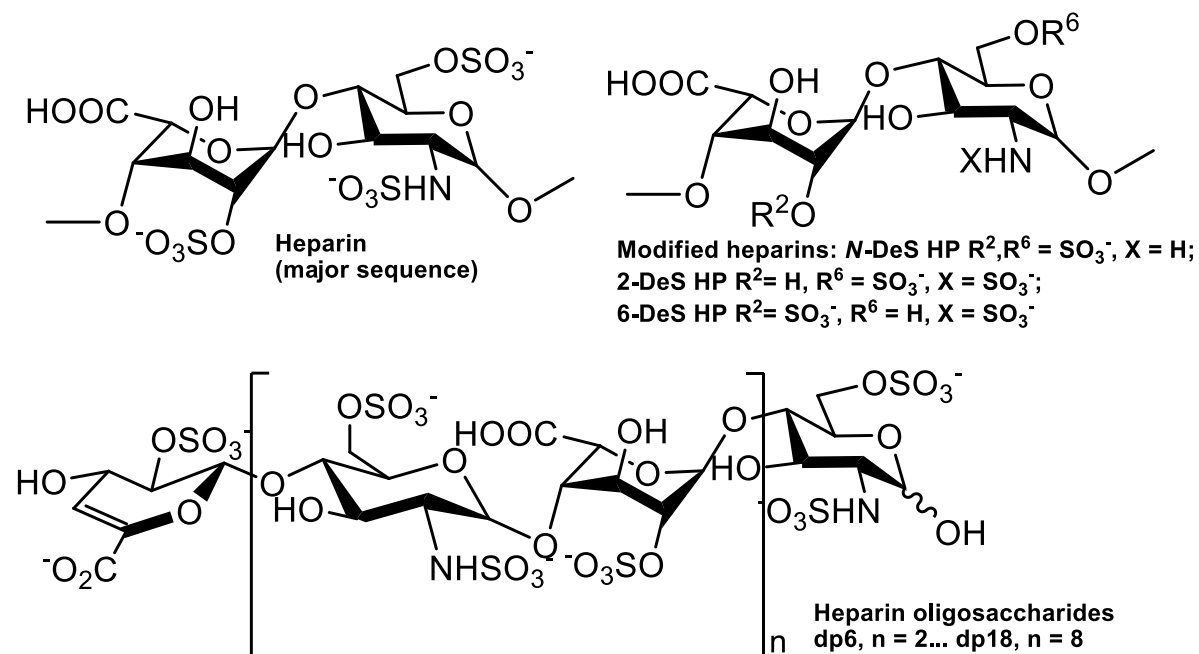

**Figure S1:** Chemical structures of heparin, heparin oligosaccharides and chemical modified heparins used in this study.
